# Supplementary material for: A novel copper-based nanosystem for augmented breast cancer photothermal and chemodynamic therapy
Source: Royal Society of Chemistry journal article supplement (doi:10.1039/d5ra08100a), 2026-01-01
Supplement: d5ra08100a1.pdf [file d5ra08100a1.pdf]

## **A novel copper-based nanosystem for augmented breast cancer photothermal and chemodynamic therapy**

Mohammad Seyedhamzeh<sup>1,#</sup>, Farzaneh Falahi<sup>2,#</sup>, Ali Kalantari-Hesari<sup>3</sup>, Kimia Esmaeilzadeh<sup>1</sup>, Laleh Salarilak<sup>1</sup>, Hadi Bagheri<sup>1</sup>, Shayesteh Bochani<sup>1</sup>, Satar Yousefiasl<sup>4</sup>, Helia Behrouzfar<sup>5</sup>, Mohammad-Esmaeil Akbari<sup>6\*</sup>, Aziz Maleki<sup>7,1\*</sup>

### **Affiliations:**

<sup>1</sup>Zanjan Pharmaceutical Nanotechnology Research Center (ZPNRC), Zanjan University of Medical Sciences, Zanjan 45139-56184, Iran

<sup>2</sup>Department of Medical Biotechnology, School of Medicine, Zanjan University of Medical Science, Zanjan 45139-56111, Iran

<sup>3</sup>Department of Basic Sciences, Faculty of Veterinary Medicine, Bu-Ali Sina University

<sup>4</sup>Department of Pharmaceutical Nanotechnology, School of Pharmacy, Zanjan University of Medical Sciences, Zanjan 45139-56184, Iran

<sup>5</sup>Faculty of Veterinary Medicine, Science and Research Branch of Islamic Azad University, Tehran, Iran

<sup>6</sup>Dental Research Center, Dentistry Research Institute, Tehran University of Medical Sciences, Tehran 1417614411, Iran

<sup>6</sup>Cancer Research Center, Shahid Beheshti University of Medical Sciences, Tehran, Iran.

<sup>7</sup>Department of Pharmaceutical Nanotechnology, School of Pharmacy, Zanjan University of Medical Science, Zanjan 45139-56111, Iran

<sup>#</sup>These authors contributed equally

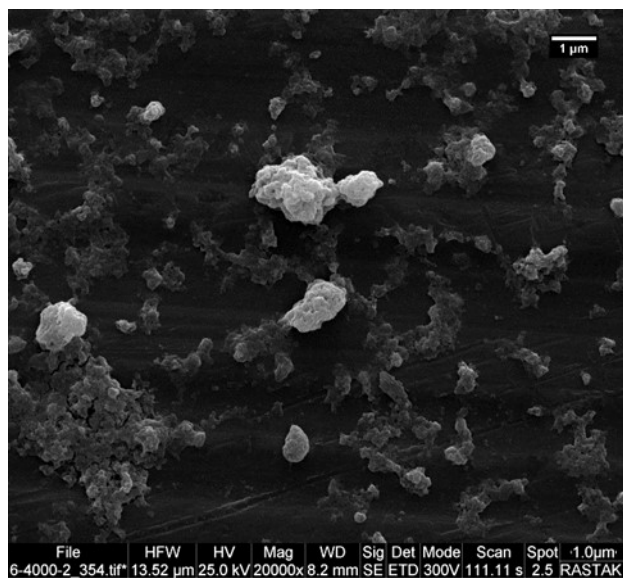

**Fig. S1** SEM image of DL-Cu-Cys After incubation with  $\text{H}_2\text{O}_2$

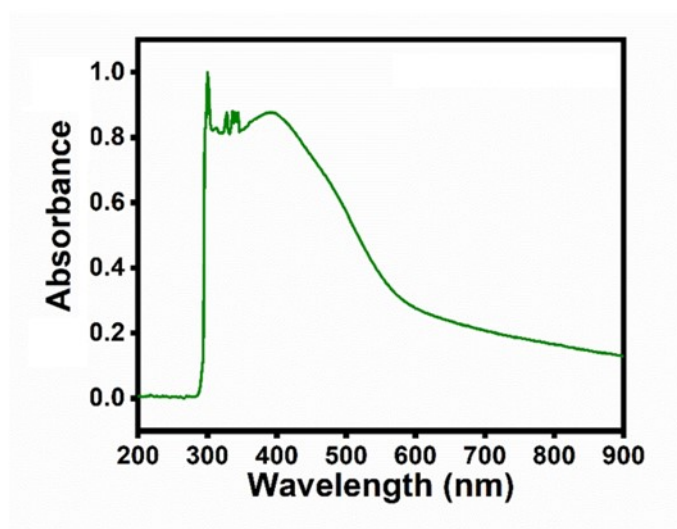

**Fig. S2** UV-vis spectrum of DL-Cu-Cys after incubation with  $\text{H}_2\text{O}_2$

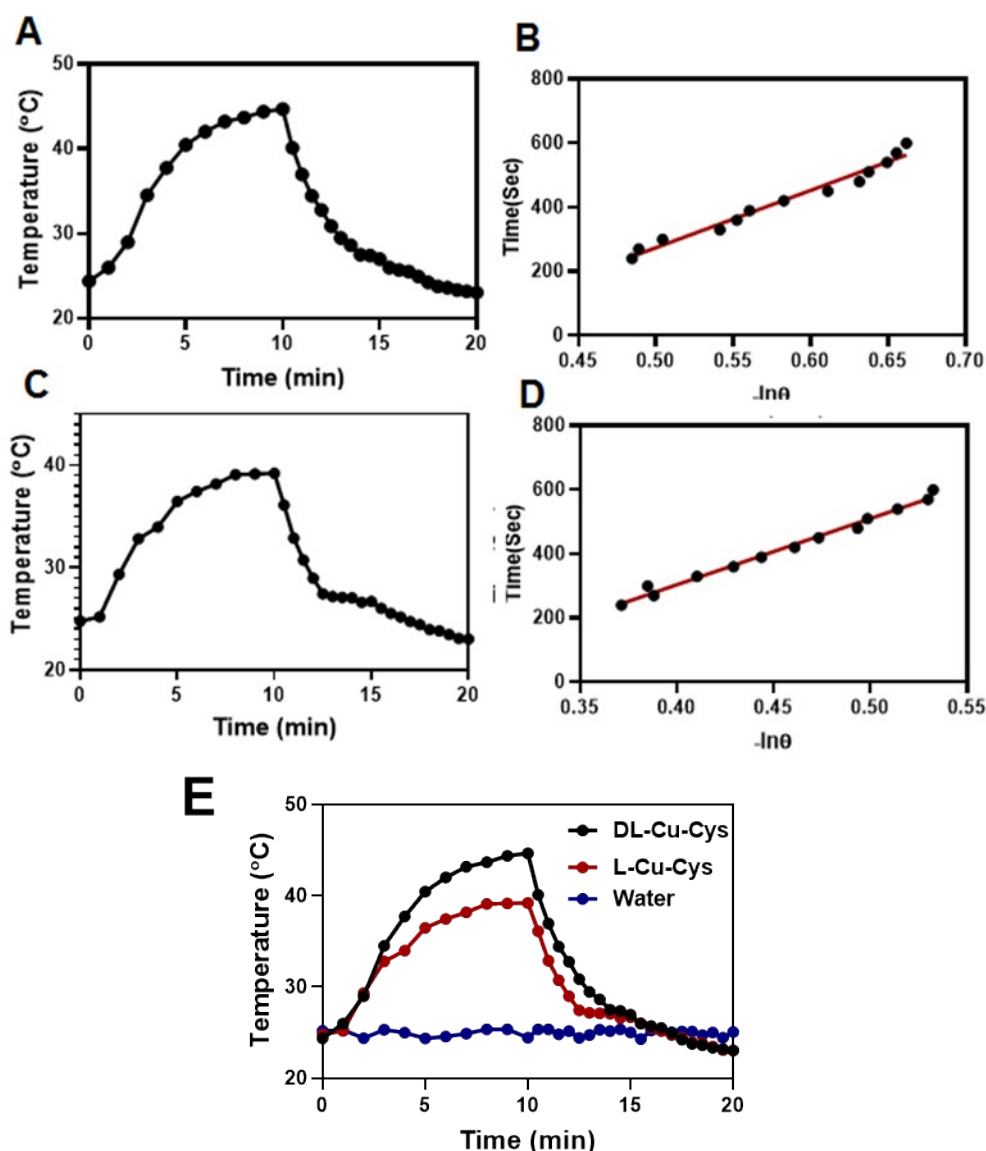

**Fig. S3** (A) The photo thermal response of the DL-Cu-Cys with a NIR laser (808 nm,  $1.5 \text{ W cm}^{-2}$ ) for 10 min and the cooling phase of 10 min. (B) Linear time data *versus*  $-\ln\theta$  measured by the cooling period of Figure 4A and (C) The photo thermal response of the L-Cu-Cys with a NIR laser (808 nm,  $1.5 \text{ W cm}^{-2}$ ) for 10 min and the cooling phase of 10 min. (D) Linear time data *versus*  $-\ln\theta$  measured by the cooling period of Figure 4c (E) Temperature curves of DL-Cu-Cys, L-Cu-Cys NPs, and water (808 nm,  $1.5 \text{ W cm}^{-2}$ ).

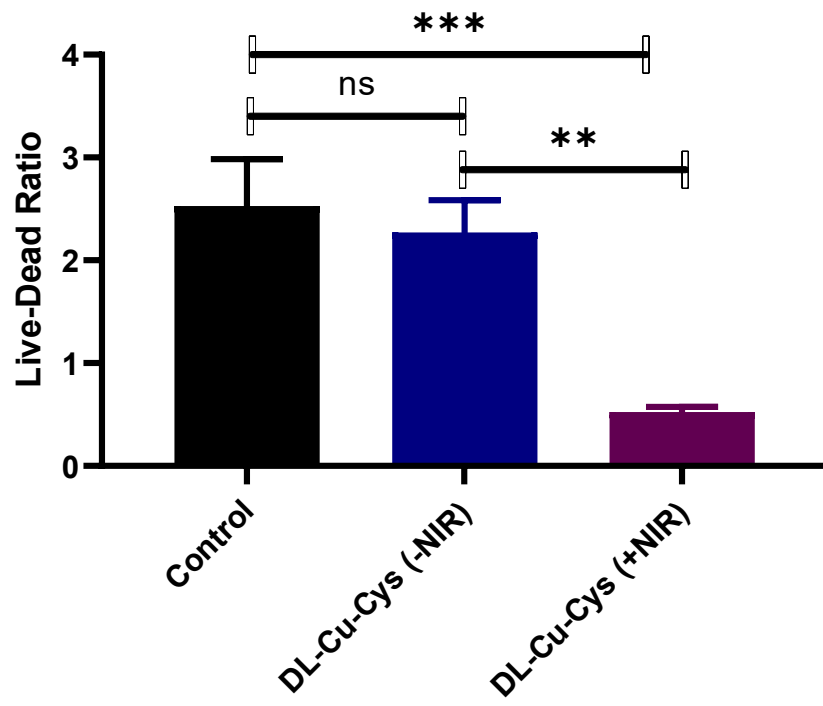

**Fig. S4** The live/dead ratio in each groups was quantified. Data are expressed as mean  $\pm$  SD of three independent replicates. Significant differences are marked with \*\*  $p < 0.01$  and \*\*\*  $p < 0.001$ .

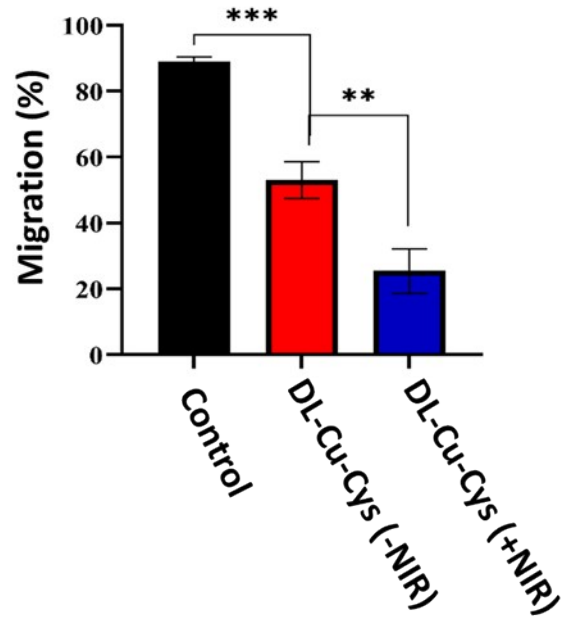

**Fig. S5** The percentage of migrated cells in each groups was quantified. Data are expressed as mean  $\pm$  SD of three independent replicates. Significant differences are marked with \*\*  $p < 0.01$  and \*\*\*  $p < 0.001$ .

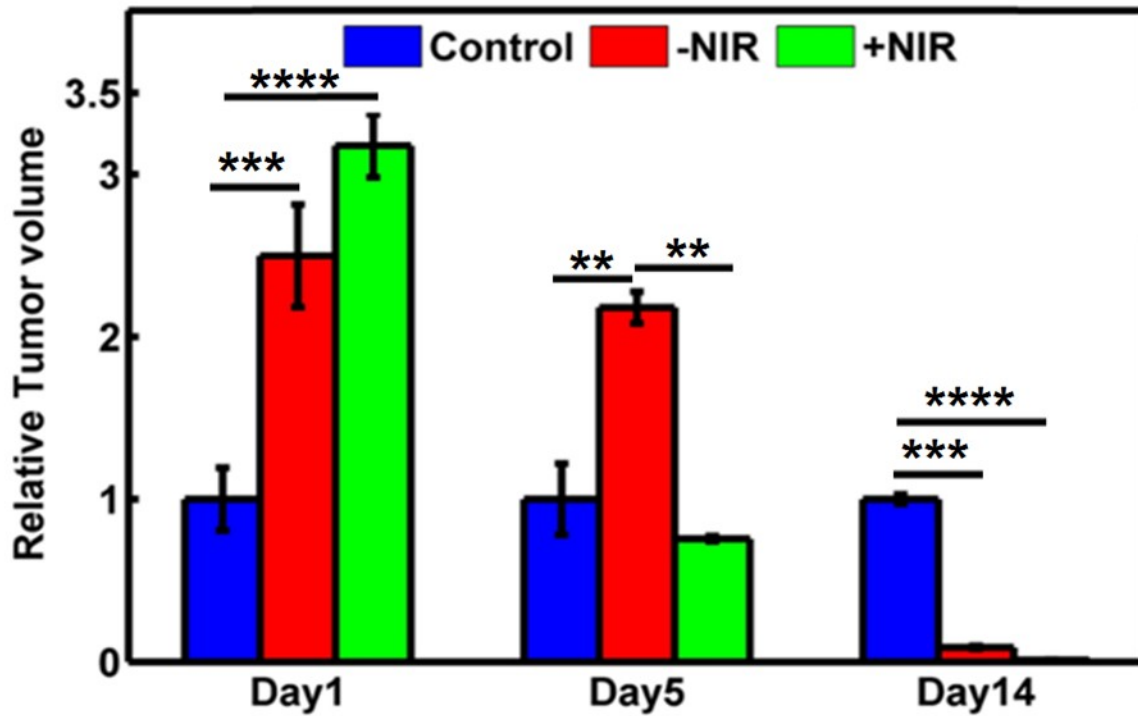

**Fig. S6** Monitoring assay for the change of tumor volume (mm<sup>3</sup>) over 14 days. Significant differences are marked with \*\*  $p < 0.01$  and \*\*\*  $p < 0.001$ , and \*\*\*\*  $p < 0.0001$ .

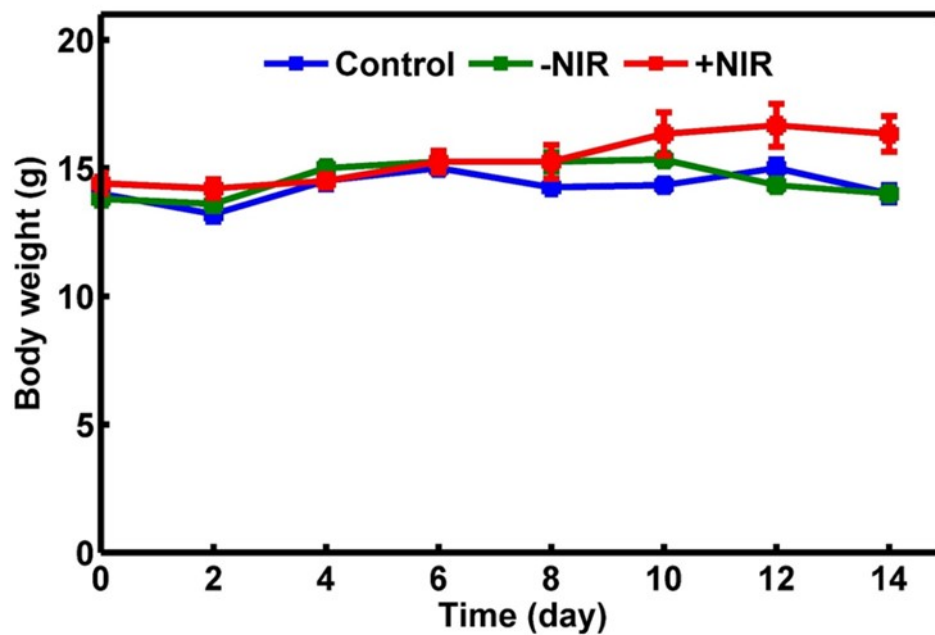

**Fig. S7** The measurement of the change of body weight over 14 days.
